## ERRATUM

### **Role of Heat Shock Protein 90 and Endothelial Nitric Oxide Synthase during Early Anesthetic and Ischemic Preconditioning**

In the article that appeared on pages 317-25 of the February issue, the grant number for Dr. Kersten was incorrect. The correct grant number is HL063705. This error has been noted in the online version of the article, which is available at [www.anesthesiology.org](http://www.anesthesiology.org).

#### **Reference**

Amour J, Brzezinska AK, Weihrauch D, Billstrom AR, Zielonka J, Krolikowski JG, Bienengraeber MW, Wartier DC, Pratt PF Jr., Kersten JR: Role of heat shock protein 90 and endothelial nitric oxide synthase during early anesthetic and ischemic preconditioning. *ANESTHESIOLOGY* 2009; 110:317-25
